1 **Title: BMP signaling: A significant player and therapeutic target for**  
2 **osteoarthritis**

3 **Running title: Targeting BMP signaling for osteoarthritis therapy**

4

5 **AUTHORS:**

6

7 Akrit Pran Jaswal<sup>1, #</sup>, Bhupendra Kumar<sup>1, #</sup>, Anke J. Roelofs<sup>3</sup>, Sayeda Fauzia Iqbal<sup>1</sup>,  
8 Amaresh Kumar Singh<sup>1,4</sup>, Anna H.K. Riemen<sup>3</sup>, Hui Wang<sup>3</sup>, Sadaf Ashraf<sup>3</sup>, Sanap  
9 Vaibhav Nanasaheb<sup>1</sup>, Nitin Agnihotri<sup>1</sup>, Cosimo De Bari<sup>3</sup>, Amitabha Bandyopadhyay<sup>1</sup>,

10 <sup>2 \*</sup>

11

12 **AFFILIATIONS:**

13

14 <sup>1</sup> Department of Biological Sciences and Bioengineering, Indian Institute of  
15 Technology Kanpur, Kanpur-208016, Uttar Pradesh, India and

16 <sup>2</sup> The Mehta Family Centre for Engineering in Medicine, Indian Institute of  
17 Technology Kanpur, Kanpur, Uttar Pradesh, India.

18 <sup>3</sup> Arthritis and Regenerative Medicine Laboratory, Aberdeen Centre for Arthritis and  
19 Musculoskeletal Health, Institute of Medical Sciences, University of Aberdeen,  
20 Aberdeen AB25 2ZD, UK

21 <sup>4</sup> Department of Zoology, Banaras Hindu University, Varanasi-221005, Uttar  
22 Pradesh, India

23

24 # These two authors contributed equally

25 \*Corresponding Author: Amitabha Bandyopadhyay

26 Email address: [abandopa@iitk.ac.in](mailto:abandopa@iitk.ac.in)

27

28 **KEYWORDS:** BMP, Osteoarthritis, articular cartilage, local inhibition, LDN-193189

29

30 .

31 **ABSTRACT:**

32 **Objective:** To investigate the role of BMP signaling in osteoarthritis' pathogenesis and  
33 propose a disease-modifying therapy for OA.

34 **Methods:** C57BL6/J mouse line was used to perform ACLT surgery at P120 to study  
35 the expression pattern of the BMP signaling readout pSMAD1/5/9. To investigate  
36 whether activation of BMP signaling is sufficient and necessary to induce  
37 osteoarthritis, we have used conditional GOF and LOF mouse lines in which BMP  
38 signaling can be activated or depleted, respectively, upon intra-peritoneal injection of  
39 tamoxifen. Finally, we locally inhibited BMP signaling through intra-articular injection  
40 of LDN-193189 pre- and post-onset surgically induced OA. Most of the analysis has  
41 been done through immunohistochemistry, histopathological staining, and micro-CT  
42 to evaluate the status of the pathogenesis of the disease.

43 **Results:** We observed concomitant activation of BMP signaling, as judged by  
44 pSMAD1/5/9 immunoreactivity in the articular cartilage, upon induction of  
45 osteoarthritis with simultaneous depletion of SMURF1, an intra-cellular BMP signaling  
46 inhibitor in articular cartilage. Even without surgical induction of osteoarthritis, only  
47 BMP gain-of-function mutation induces OA in mouse articular cartilage. Also, genetic,  
48 or pharmacological inhibition of BMP signaling offered significant protection against  
49 OA pathogenesis. Interestingly, post-onset of the disease, inhibition of BMP signaling  
50 by intra-articular injection of LDN-193189 retarded OA progression with a significant  
51 reduction in inflammatory markers.

52 **Conclusion** – Our study demonstrated that BMP signaling plays an essential role in  
53 the pathogenesis of OA and that local BMP inhibition can be an effective therapeutic  
54 strategy to mitigate osteoarthritis.

55

## 56 **Introduction**

57 Osteoarthritis (OA) is a painful, debilitating musculoskeletal disorder with a profound  
58 socioeconomic burden and is the primary cause of locomotive disability affecting  
59 millions of people worldwide(1–3). The alarmingly increasing prevalence of OA is  
60 exacerbated further as no therapy exists to manage OA except for symptomatic  
61 treatment with anti-inflammatory drugs or surgical intervention in late stage disease(4).  
62 It is imperative, therefore, to discern the molecular basis of pathogenesis of OA to  
63 develop a disease modifying therapy. Articular cartilage, the tissue affected in OA, is  
64 a lubricated, avascular, alymphatic and aneural that lines the ends of the bones at the

65 joints. During OA, the joint surface undergoes a slew of changes characterised by loss  
66 of cartilage proteoglycans, hypertrophy of chondrocytes, angiogenesis, osteophyte  
67 formation, and ultimately failure of joint function(4). The cellular and molecular  
68 changes of the joint cartilage during the onset and progression of OA closely resemble  
69 the steps of endochondral ossification, the developmental process by which long  
70 bones form within cartilage anlagen(5, 6).

71 During endochondral ossification, most of the initial cartilage mass in an appendicular  
72 skeletal element is replaced by newly formed bone, except for the cartilage at the  
73 termini. The cartilage that is replaced by bone is referred to as the transient cartilage,  
74 while the cartilage at the terminal ends is referred to as the joint or articular or  
75 permanent cartilage(7). During transient cartilage differentiation, type II collagen  
76 (Col2a1- expressing cartilage cells undergo a series of changes. These cells undergo  
77 pre-hypertrophic differentiation wherein they express Indian hedgehog (IHH),  
78 subsequently the transition from pre-hypertrophy to hypertrophy is marked by the  
79 expression of type X collagen (ColX). The hypertrophic cells are infiltrated by blood  
80 vessels. This is followed by matrix remodelling, where enzymes viz. MMP-13 and  
81 ADAMTS-5, degrade the existing collagen matrix and a new matrix, rich in type I  
82 collagen (Coll), is synthesised and bone formation is accomplished(8, 9).

83 Ray *et al.* discovered a zone of Col2a1-expressing bipotential proliferating cells known  
84 as the Distal Proliferative Zone (DPZ) within a developing appendicular skeletal  
85 element. The DPZ cells under the influence of BMP signaling undergo transient  
86 cartilage differentiation, whereas when exposed to Wnt signaling they undergo joint  
87 cartilage differentiation(1). Some of the molecules involved in transient cartilage  
88 differentiation, viz. MMP-13, ADAMTS-5, and VEGF-A, are reported to be associated  
89 and/or necessary for the pathogenesis of OA (10–16).

90 Previous literature suggests that ectopic activation of BMP signaling in developing  
91 cartilage or presumptive joint sites, either by overexpression of BMP ligands(1, 17) or  
92 misexpression of constitutively active BMP receptors(18), results in transient cartilage  
93 differentiation at the expense of joint cartilage. A surge in BMP2 and BMP4 ligands  
94 was reported in human articular cartilage having a moderate to severe form of  
95 osteoarthritis(19). Blocking BMP signaling inhibits chondrocyte hypertrophy and  
96 mineralization indicates it is important player in terminal differentiation of BMSCs (20).

97 Additionally, Noggin administration in an ACLT induced OA model inhibits OA  
98 progression by inhibiting IL-1 $\beta$  and BMP-2(21). A recently published in-vitro study  
99 indicates reduction of chondrocyte hypertrophy after BMP receptors were inhibited  
100 using LDN-193189(22). Immobilisation of developing embryonic limbs leads to ectopic  
101 differentiation of transient cartilage at the cost of articular cartilage. Moreover, it was  
102 shown that immobilization induced OA leads to ectopic upregulation of BMP signaling  
103 within the sub-articular cartilage domain where cartilage precursors are normally  
104 exposed only to Wnt signaling (23). Recently, it was also demonstrated that  
105 pharmacological inhibition of BMP signaling promotes articular cartilage differentiation  
106 in hMSC derived chondrocytes and allows the cells to maintain an articular  
107 chondrocyte phenotype for longer a duration of time upon implantation in mice(2),  
108 suggesting that an embryonic paradigm of spatial restriction of BMP signaling is  
109 needed for differentiation and maintenance of the articular cartilage phenotype.  
110 However, few studies indicate BMPs have an anabolic effect on articular cartilage  
111 integrity(24).

112 Taken together, we hypothesised that BMP signaling-induced transient cartilage  
113 differentiation within the adult articular cartilage domain is the molecular basis of the  
114 pathogenesis of OA. In this study, we tested this hypothesis with conditional gain-and  
115 loss-of-function mouse mutants of BMP signaling in conjunction with a surgically  
116 induced model of OA. Our findings in the mouse model are further supported by data  
117 obtained from osteoarthritic human cartilage specimens, wherein we found evidence  
118 of active BMP signaling in the joint cartilage. Moreover, our data indicates that  
119 pharmacological inhibition of BMP signaling in the synovial joint may serve as an  
120 effective disease modifying therapy for OA.

121

## 122 **Materials and Methods:**

123 Details of methodology is given in supplementary section.

124

## 125 **Generation of mice lines**

126 All animals were housed, bred, and maintained in Central Experimental Animal Facility  
127 (CEAF) of Indian Institute of Technology Kanpur, India. All experiments were  
128 performed in accordance with the guidelines of the Institutional Animal Ethics  
129 Committee (IAEC) as well as under the aegis of the Centre for Purpose of Control and  
130 Supervision of Experiments on Animals (CPCSEA), Government of India under  
131 protocols IITK/IAEC/2013/1002; IITK/IAEC/2013/1015; IITK/IAEC/2013/1040 and  
132 IITK/IAEC/2022/1166. We obtained B6By/J wild type mice, *TgTgCol2a1-Cre-ERT2*  
133 (46) and *ROSA26 mT/mG* (47) strains from Jackson Laboratories, USA; *pMes-*  
134 *caBmpr1a* mice as gift from Prof. YiPing Chen at Tulane University, USA; *Bmp2c/c*;  
135 *Bmp4c/c* mice from Prof. Clifford Tabin at Harvard Medical School, USA. For BMP  
136 signaling gain-of-function, *pMes-caBmpr1a* mice were crossed with *TgTgCol2a1-Cre-*  
137 *ERT2* mice to generate *pMes-caBmpr1a; TgCol2a1-Cre-ERT2. Bmp2c/c; Bmp4c/c*  
138 (29) animals were crossed with *TgTgCol2a1-Cre-ERT2* to generate *Bmp2c/c*;  
139 *Bmp4c/c; TgTgCol2a1-Cre-ERT2* for BMP loss-of-function mutation.

#### 140 **Anterior Cruciate Ligament Transection (ACLT)**

141 ACLT surgeries were conducted at P120 left limb of B6By/J wild type male mice and  
142 harvested at post ACLT day 07, 14, 21, 28, and 56 for molecular and histological  
143 analysis. ACLT in *Bmp2c/c; Bmp4c/c; TgTgCol2a1-Cre-ERT2* mice line for BMP2/4  
144 loss-of-function conducted at P84 after 14<sup>th</sup> day of TAM injection. Animals were  
145 anesthetized using isoflurane and followed standard protocol during surgical  
146 procedure (28).

#### 147 **Human sample collection**

148 Osteoarthritic cartilage from 6 patients and non-osteoarthritic cartilage from one  
149 patient undergoing knee joint excision for malignancy at a site not involving sampled  
150 area, were obtained after informed consent and in accordance with the relevant  
151 guidelines and regulations, with approval from the NHS Grampian Biorepository  
152 Tissue Bank Committee, UK.

153

## 154 **OARSI scoring**

155 The OARSI scores were calculated using the recommended guidelines for  
156 assessment of osteoarthritic severity in small animals (mice)(26, 27).

## 157 **Micro-Computed Tomography ( $\mu$ CT)**

158

159 Images were reconstructed and analysed using NRecon v1.6 and CTAn 1.16.8.0,  
160 respectively. Fixed tissues were taken in 5ml microfuge tube in hydrated condition  
161 and imaged using high resolution  $\mu$ CT (Skyscan 1172).

162

## 163 **Statistics**

164 Graph Pad Prism 8.0.2 software was used to ascertain statistical significance of the  
165 OARSI histopathological scoring data. One-way ANOVA with post-hoc analysis  
166 (Dunnett's test) and Unpaired t- test was performed to calculate the statistical  
167 significance and interdependence between different experimental groups. The results  
168 were plotted using Graph Pad Prism 8.0.2 software. The error bars represent Standard  
169 Deviation (S.D.)

170

## 171 **RESULTS:**

### 172 **1. Overexpression of BMP signaling in adult joint cartilage is sufficient to induce** 173 **the development of an OA-like phenotype in mice**

174 To examine whether overexpression of BMP signaling in the articular cartilage is  
175 sufficient to induce osteoarthritis like changes in adult mice, we activated BMP  
176 signaling in postnatal cartilage at P70 by injecting tamoxifen intraperitoneal cavity of  
177 *pMes-caBmpr1a; TgCol2a1-Cre-ERT2* mouse (Fig.1A) (*Referred to as induction from*  
178 *here on*). Seven days of over-expression of *caBmpr1a* in adult mouse articular  
179 cartilage, ectopic activation of canonical BMP signaling, as assessed by  
180 immunoreactivity towards phosphorylated SMAD1/5/9, was observed, and it peaks  
181 after two weeks (Fig.1C'-C'''). Expression of IHH, which marks a pre-hypertrophic  
182 state of cartilage, was observed within 7 days of induction and by 14<sup>th</sup> day after  
183 induction, IHH expression has been reduced (Fig.1D-D''). ColIII expression pattern

184 depletes on the 14th post-induction day and reaches a nadir on the 56th post-induction  
185 day (Fig.1E-E'''). The ColX expression, indicative of cartilage hypertrophy, was observed 14  
186 days after induction, with the largest extent of hypertrophy occurring 56 days later (Fig.1F-  
187 F'''). Embryonic (23, 28), as well as adult articular cartilage cells (2), are proliferation  
188 deficient while transient cartilage cells are proliferative(1). In our experiments, we  
189 observed that along with other markers of transient cartilage differentiation,  
190 proliferation was also stimulated in the adult mouse articular cartilage after activation  
191 of BMP signaling. BrdU uptake increased in joint cartilage 7 days after induction  
192 reaching a peak on 14<sup>th</sup> day of induction (Fig.1G-G''). Safranin O/Fast Green staining  
193 revealed a loss of proteoglycan staining in multiple zones with vertical clefts in the  
194 articular cartilage (Fig. 1H-1H'). OARSI scoring for integrity of articular cartilage  
195 indicates the severity of loss of articular cartilage in TAM injected versus control  
196 samples (Fig.1I). A similar trend to transient cartilage differentiating is indicated by  
197 quantification of ColII and ColX expression in control tissues vs samples injected with  
198 TAM (Fig.1J and Fig.1K).

199 Besides the molecular signatures, Micro CT imaging of hind limbs revealed extensive  
200 osteophyte (indicated by black arrow) formation upon ectopic activation of *Bmpr1a* in  
201 the articular cartilage (Fig.1B). Taken together, these observations indicate that  
202 ectopic activation of BMP signaling is sufficient to induce the development of an OA  
203 like phenotype in adult mice.

204

## 205 **2. BMP signaling induced transient cartilage differentiation is necessary for the** 206 **pathogenesis of OA**

207 Next, we investigated the necessity of BMP signaling in the development of the  
208 osteoarthritic phenotype. It has been previously reported that levels of BMP-2 ligands  
209 are elevated in synovial fluid from OA patients and BMP receptor localisation is  
210 associated with OA severity (19, 29). We performed anterior cruciate ligament  
211 transection (ACLT) to induce OA in mice and examined BMP signaling readout  
212 pSMAD1/5/9 in knee articular cartilage every week following ACLT. (30, 31)... In  
213 comparison to sham operated knees (Fig. S1A) or 7 days post ACLT (Fig. S1B), we  
214 found increased pSMAD1/5/9 immunoreactivity 14 days after ACLT (Fig. S1B'), which  
215 lasted until 56 days after ACLT (Fig. S1B'', Fig. S1B''', and Fig. 2B'). we also found



216 increase in In line with our findings in the context of ectopic BMP signaling activation,  
217 we found increased of BrdU uptake in the articular cartilage of mice following ACLT  
218 (Fig. S1C and S1D-D'''). In order to prevent activation of BMP signaling post ACLT,  
219 we used a previously described *Bmp2/4* double conditional knockout strain(32). We  
220 used *Bmp2<sup>c/c</sup>; Bmp4<sup>c/c</sup>; TgCol2a1-Cre-ERT2* mice line to inject tamoxifen  
221 intraperitoneally at P70 thereafter ACLT was performed at P84 (Fig. S2A and Fig. 2A).

222 As expected, after ACLT, pSMAD1/5/9 immunoreactivity was minimal in articular  
223 cartilage of *Bmp2/4*-depleted animals. (Fig. S2B'' and Fig. 2B''). Distribution and  
224 abundance of ColIII was significantly preserved in *Bmp2/4* depleted animals even after  
225 56 days of ACLT (Fig. S2C-C'' and Fig. 2C-C''). Chondrocyte hypertrophy, as  
226 assessed by ColX immunoreactivity (Fig. 2D-D'') as well as expression of MMP-13  
227 (Fig. 2E-E''), a key matrix remodelling enzyme, were remarkably elevated after 56  
228 days of ACLT (Fig. 2D' and Fig. 2E'). However, the depletion of *Bmp2/4* shielded from  
229 upregulation and allowed the maintenance of a ColX. (Fig. 2D'') and MMP-13 (Fig.  
230 2E'') which were almost comparable to that of sham (Fig. 2D and Fig. 2E) Articular  
231 cartilage loss was observed in ACLT specimens as measured by Safranin O/Fast  
232 green staining, these changes were minimal in BMP ligand depletion specimen (Fig.  
233 2F-F''). Micro-computed tomography ( $\mu$ CT) structural examination revealed that the  
234 "ACLT + Vehicle" group had extensive damage to articular surfaces (roughness) as  
235 well as osteophyte formation (marked by red arrows) (Fig.2G'). However, these  
236 changes were minimal in BMP ligands were depleted specimen, the severity and  
237 extent of these changes were minimal, and were significantly (Fig. 2G''), and  
238 comparable to sham operated group (Fig.2G), indicating that cartilage protection was  
239 provided. Quantification of ColIII and ColX in the ACLT+BMP depleted group reveals  
240 significant similarity with the Sham control (Fig. 2J & 2K). OARSI scoring indicates  
241 significant protection of articular cartilage integrity in the BMP depleted +ACLT group  
242 compared to the ACLT+vehicle group (Fig. 2L)

243 To ascertain the clinical relevance of these findings, we examined both osteoarthritic  
244 and non-osteoarthritic human articular cartilage. pSMAD1/5/9 immunoreactivity was  
245 found in all zones of osteoarthritic cartilage from patients who had arthroplasty (Fig.  
246 2H'', 2H'''), whereas human cartilage from a donor with no known history of OA showed  
247 no detectable pSMAD1/5/9 immunoreactivity (Fig. 2I'', 2I'''). There was no



248 pSMAD1/5/9 immunoreactivity in phosphatase-treated osteoarthritic cartilage (Fig.  
249 2H', 2I')

250

### 251 **3. Local pharmacological inhibition of BMP signaling halts the progression of** 252 **osteoarthritic changes**

253 In order to determine if local inhibition of BMP signalling after ACLT would slow the  
254 progression of osteoarthritis in mice, LDN-193189, a well-known dorsomorphin  
255 derivative and BMP signalling inhibitor, was administered in the joint cavity. (33–35).  
256 LDN-193189 activity was assayed using the BRITER (BMP Responsive Immortalized  
257 Reporter) cell line. (25) (see Materials and Methods). LDN-193189 inhibited BMP  
258 signaling in the BRITER cell line at concentrations as low as 100 nM (Fig. S3).

259 Considering possible dilution and volume loss of LDN-193189 during the injection, we  
260 used 6µl of 10 µM (in 3% w/v 2-hydroxypropyl- β-cyclodextrin in PBS) of LDN-193189  
261 for intra-articular injection to inhibit BMP signaling following ACLT. Seven consecutive  
262 doses of LDN-193189 was given starting from 14<sup>th</sup> to 21<sup>st</sup> day post-surgery and tissue  
263 were harvested at 28 days post-surgery (Fig. 3A).

264 We found local inhibition of BMP signaling significantly abrogates OA like changes  
265 following ACL transection in mice. The pSMAD1/5/9 positive cells were found in zones  
266 of articular cartilage in vehicle administered ACLT knee joints (Fig.3B') while lesser  
267 immunoreactivity to pSMAD1/5/9 was observed in articular cartilage of LDN-193189  
268 treated set post ACLT (Fig. 3B'') and the sham operated knee cartilage (Fig.3B), The  
269 immunoreactivity against ColIII in LDN-193189 treated knee joints was like sham  
270 operated (Fig. 3C and 3C'') as compared to ACLT+vehicle group (Fig.3C') suggesting  
271 reduced depletion of ColIII post-surgery and protection of cartilage. The hypertrophy  
272 of cartilage cells was found to be limited to the calcified zones, with minimal ColX  
273 immunostaining in the articular cartilage of LDN-193189 treated ACLT induced OA  
274 mice (Fig. 3D''), similar to the sham set (Fig. 3D), whereas vehicle injected animals  
275 showed extensive hypertrophy throughout the cartilage matrix (Fig. 3D'). Similarly,  
276 MMP-13 levels in articular cartilage were found to be significantly reduced after intra-  
277 articular administration of LDN-193189 (Fig.3E''), whereas a global upregulation of  
278 MMP-13 was observed in vehicle-injected knee joints (Fig.3E'). Proteoglycan

279 depletion and cartilage damage were found to be minimal in the tibial surface of LDN-  
280 193189 injected patients (Fig. 3F'') when compared to the vehicle injected group (Fig.  
281 3F'), and cartilage integrity was found to be comparable to sham operated knees (Fig.  
282 3F). ACLT+LDN-193189 injected samples had similar ColIII quantification data to sham  
283 operated controls. However, it was significantly lower in ACLT+vehicle injected  
284 samples (Fig.3G). Similarly, quantitative data for ColX expression in ACLT+LDN-  
285 193189 injected samples was similar to sham operated samples and significantly  
286 lower than ACLT+vehicle injected samples (Fig.3H). Moreover, OARSI scoring of  
287 cartilage revealed a significantly attenuated osteoarthritic-like phenotype in the LDN-  
288 193189 treated group as compared to the vehicle-treated ACLT group, and it was  
289 similar to the sham-operated group (Fig. 3I). Taken together, these findings suggest  
290 that *in situ* inhibition of BMP signaling in articular cartilage is sufficient to prevent the  
291 phenotypic and molecular changes associated with the development and progression  
292 of OA in a surgically induced osteoarthritic mouse model.

293

#### 294 **4. Inhibition of BMP signaling post-onset of OA attenuates disease severity**

295 *In situ* inhibition of BMP signaling before the onset of OA following ACL transection in  
296 mice retards the progression of OA. However, in a clinical setting, patients report to  
297 the clinic after the disease has set in. We therefore investigated if local inhibition of  
298 BMP signaling can mitigate the severity of osteoarthritic changes even after the  
299 disease has set in. For this purpose, seven consecutive intra-articular LDN-193189  
300 injections were administered starting on post-surgery day 35 and finishing on post-  
301 surgery day 42. The knees were harvested at post-surgery day 56 (Fig.4A). In contrast  
302 to the vehicle-treated knee joints (Fig. 4B'), ColIII positive cells were found throughout  
303 the articular cartilage in the LDN-193189-treated samples (Fig. 4B''), which is very  
304 similar to the sham-operated group (Fig. 4B). The vehicle-treated group had  
305 significantly higher ColX and MM13 immunoreactivity than the LDN-193189-injected  
306 and sham-operated groups (Fig.4C-4C'' and Fig.4D-4D'' respectively). Articular  
307 cartilage integrity, as determined by Safranin O staining, was preserved in LDN-  
308 193189 treated knee joints and was comparable to sham operated knees (Fig.4E and  
309 4E''), whereas vertical cleft and articular cartilage loss were observed in vehicle treated  
310 ACLT knee joints (Fig. 4E'). The  $\mu$ CT imaging reveals that cartilage surface erosion

311 was reduced in the LDN-193189-treated knees compared to the vehicle-injected  
312 knees. (Fig. 4F-4F''; red arrow marks osteophytes). The quantification of ColII  
313 expression was significantly higher in the case of ACLT+LDN-193189 injected  
314 samples than vehicle injected control and it was close to sham operated samples (Fig.  
315 4G). Similarly, quantified data for ColX immunoreactivity was higher in vehicle injected  
316 samples while it was significantly reduced in LDN-193189 injected samples and it was  
317 like a sham operated control (Fig.4H). The OARSI scores in the LDN-193189-treated  
318 group were significantly lower than those in the ACLT group, even though  
319 administration of LDN-193189 was performed after the onset of disease. It should be  
320 noted, though, that less protection of cartilage was afforded, as judged by the OARSI  
321 severity scores, to the knee joints treated with LDN-193189 post-onset of OA  
322 compared to when knee joints were treated with LDN-193189 pre-onset of OA  
323 (compare Fig. 3I and Fig. 4I).

324 We have observed that intra-articular administration of LDN-193189 provides  
325 protection against OA-like changes at least for 14 days post injection (Fig.4). Next, we  
326 wanted to investigate the potential for clinical translatability of LDN-193189 or similar  
327 molecules as disease modifying agents. We examined whether LDN-193189 can  
328 confer longer-term protection against surgically induced OA by emulating a clinic-like  
329 regimen of minimum dosage and maximum efficacy over extended durations of time.  
330 Our data (Fig. S2) as well as the existing literature (36) suggest that molecular  
331 changes associated with OA are apparent within 28 days of ACLT. Hence, we  
332 conducted ACLT at P120, injected LDN-193189 intra-articularly on PS28, PS30, and  
333 PS32, and harvested the knee joint 56 days later at PS84. ColII expression (compare  
334 Fig. 5B with Fig. 5B''') and cartilage specific proteoglycan content (compare Fig. 5D  
335 with Fig. 5D''') were largely preserved in the LDN-193189 injected specimen when  
336 compared to the vehicle control. In addition, ColX immunoreactivity was significantly  
337 lower in LDN-193189-treated knee joints compared to vehicle-injected knee joints  
338 (compare Figs. 5C and 5C'). This set of data suggests that even after the onset of  
339 surgically induced OA, blocking the BMP signaling pathway locally can offer protection  
340 for at least 56 days in mice.

341

342 **5. Mechanistic insight into the pathogenesis of OA from a developmental**  
343 **biology perspective**

344 Recently, Singh *et al.*, demonstrated that immobilisation of chick or mouse embryos  
345 results in transient cartilage differentiation at the expense of articular cartilage  
346 differentiation, which is associated with ectopic activation of BMP signaling (23).  
347 Further, this study also demonstrated that this ectopic activation is associated with a  
348 concurrent downregulation of expression of SMURF1, an intracellular inhibitor of the  
349 BMP signaling pathway. (23). SMURF1 expression was found to be lower in mouse  
350 articular cartilage 28 and 56 days after ACLT (Fig. 5E-E"). SMURF1 quantified data  
351 shows a significant decrease in SMURF1 expression at post-ACLT Days 28 and 56  
352 (Fig. 5F) when compared to the control group. This suggests that the molecular  
353 mechanism of articular cartilage maintenance via mechanical regulation is conserved  
354 between embryonic and postnatal stages and is likely involved in pathologies such as  
355 OA.

356

357 **6. Effect of local inhibition of BMP signaling on inflammatory responses in a**  
358 **surgically induced osteoarthritic mouse model**

359 We performed an analysis for candidate inflammatory response molecules, which are  
360 known to be involved in the development of osteoarthritis(37, 38). The NFkB  
361 immunoreactivity in the articular cartilage of the vehicle-treated ACLT group was  
362 significantly increased (Fig. 6B'), but it was minimal in the LDN-193189-treated or  
363 sham-operated groups (Figs. 6B" and 6B, respectively). We also looked at TNF-  
364 immunoreactivity in osteoarthritic cartilage after LDN-19189 treatment and found that  
365 it was significantly higher in the ACLT group injected with only vehicle (Fig. 6C', white  
366 arrow), while the LDN-19189 treated group showed minimal immunoreactivity (Fig.  
367 6C"), and it was similar in sham-operated mice where TNF-could be detected in  
368 subchondral bone (Fig. 6C). Quantitative analysis indicates TNF-and NFkB were  
369 significantly lower in LDN-193189-treated samples compared to vehicle controls  
370 (Fig.6D & 6E, respectively). Therefore, inhibition of BMP signaling not only inhibits OA  
371 markers in articular cartilage but also reduces inflammation associated with  
372 osteoarthritis.

373

374 **Discussion:**

375 This study suggests existence of striking resemblance between the molecular changes  
376 associated with pathogenesis of osteoarthritis and endochondral ossification.  
377 Moreover, the temporal order of the expression of molecular markers appears in ACLT  
378 induced OA was found to be similar with transient cartilage differentiation i.e.,  
379 endochondral bone formation. Inhibition of transient cartilage differentiation via  
380 blocking IHH signaling has been reported to inhibit and attenuate the severity of  
381 osteoarthritic phenotype post ACLT (39–41). However, so far, no IHH signaling  
382 inhibitor has been approved for clinical use. This could be because *Ihh* loss-of-  
383 function, during embryonic development, results only in a temporary delay in  
384 hypertrophic differentiation – an essential step of endochondral ossification, which  
385 eventually gets restored and even accelerated at postnatal stages in mice (41, 42).  
386 Taken together, these studies give a crucial hint that blocking transient cartilage  
387 differentiation is a viable strategy to manage osteoarthritic changes in the articular  
388 cartilage. This hypothesis is in line with what has been suggested earlier in the  
389 literature (43–45).

390 BMP signaling is known to play a critical role in transient cartilage differentiation which  
391 is regulated by an intracellular BMP signaling inhibitor SMURF1. Our results indicate  
392 up-regulated BMP signaling with concomitant depletion of SMURF1 is associated with  
393 the pathogenesis of OA. Thus the low level of BMP signaling maintained by SMURF1  
394 and divergence from it becomes inimical for cartilage health. Previously, intra-  
395 peritoneal administration of a BMP signaling inhibitor, LDN-193189, has been shown  
396 to reverse the phenotype associated with *Fibrodysplasia ossificans progressive*  
397 (FOP), a condition where progressive heterotopic ossification of muscle is observed  
398 upon injury, due to constitutive activation of BMP signaling (33). In this study, we found  
399 that activation of BMP signaling is both necessary and sufficient for the pathogenesis  
400 of OA in mice. The necessity of BMP signaling in the onset of osteoarthritis like  
401 changes in the articular cartilage has been demonstrated using both genetic and  
402 pharmacological means whereas sufficiency has been demonstrated using genetic  
403 means. Further, analysis of patient samples suggests an association between  
404 osteoarthritis and activation of BMP signaling in the articular cartilage cells. Since we  
405 have used *TgCol2a1-Cre-ERT2* mediated recombination as the means to activate  
406 expression of constitutively activated BMP receptor (caBMPRIA) we cannot rule out

407 the possibility that BMP signaling has also been activated in the growth plate cartilage  
408 of adult mice and the molecular and cellular changes observed is partly due to  
409 activated BMP signaling in the growth plate cartilage. However, all our experiments  
410 have been done after skeletal maturity of mice so there are least contribution of  
411 observed phenotype due to change in the growth plate chondrocyte. . Moreover, the  
412 changes were first observed in the superficial layers of articular cartilage suggesting  
413 that the changes observed were primarily due to ectopic activation of BMP signaling  
414 in the articular cartilage.

415 Interestingly, we also observed proliferation in articular cartilage cells, as assessed by  
416 enhanced BrdU uptake, post ACLT or activation of BMP signaling. Our data suggests  
417 that articular cartilage cells, originally having low regenerative potential and  
418 proliferative capacity, display a regenerative response upon ACLT or upregulation of  
419 BMP signaling. However, this leads to an altered tissue microenvironment that  
420 promotes transient cartilage differentiation at the expense of articular cartilage. Thus,  
421 instead of healing by regeneration it further promotes the disease condition.  
422 Prophylactically blocking BMP signaling *in situ* using LDN-193189 led to an  
423 attenuation in the severity of osteoarthritic phenotype following surgical induction in  
424 mice. Further, our investigation suggests that administration of LDN-193189 after the  
425 onset of OA not only halts the progression of OA but also an intense Safranin O-  
426 stained cartilage tissue appears which is negative for transient cartilage markers,  
427 suggesting that new cartilage formation takes place. A recent study published by Liu  
428 *et al.* in 2020 also suggests the role of BMP signaling inhibition to target osteoarthritis.  
429 However, the inhibitor has been given intra-peritoneally which is not a feasible option  
430 for patients due to its global consequences on the body.

431 Finally, it has to be acknowledged that while transient cartilage differentiation could be  
432 involved in the initiation of the disease, the inflammation associated with OA can  
433 determine the severity and course of disease progression (46, 47). Despite a large  
434 body of existing literature, there is no clear demonstration of the hierarchy between  
435 the onset of inflammation and transient cartilage differentiation. Literature suggest that  
436 BMP signaling regulates endothelial inflammatory pathway after cardiac ischemic  
437 injury (48). Our study also signifies that pharmacologically blocking BMP signaling in  
438 surgically induced OA also prevents inflammatory response activation. However,  
439 whether BMP signaling directly regulates inflammatory pathway or it induces



440 chondrocyte hypertrophy causing inflammation due to altered joint mechanics, further  
441 needs to be investigated. Nonetheless our study demonstrates that *in situ* inhibition of  
442 BMP signaling, and consequently transient cartilage differentiation, may be a potent  
443 means of disease-modifying therapy for osteoarthritis.

444

#### 445 **Acknowledgements:**

446 We are immensely grateful to Prof. YiPing Chen at Tulane University, USA, for the  
447 gift of mouse strains. We thank Prof. Frank Beier of Western University, Ontario,  
448 Canada for teaching APJ the method of ACL transection. We sincerely thank Shuchi  
449 Arora and Ankita Jena for their critical comments on the manuscript. We are highly  
450 grateful to Niveda Udaykumar and Saahiba Thaleshwari for their help in blind OARSI  
451 scoring. We thank Mr. Naresh Gupta for assistance with mouse experiments.

452

#### 453 **Author's contribution:**

454 A.B., A.P.J. and B.K. designed the experiments and A.P.J., B.K., A.K.S. S.V.N. and  
455 S.F.I. conducted experiments, collected, and analysed data. A.P.J., B.K. and S.F.I.  
456 prepared the manuscript; N.A. conducted the cell-based LDN-193189 assay. A.B.,  
457 C.D.B., A.J.R. edited the manuscript along with A.P.J.; B.K. and A.K.S. provided the  
458 data for inflammation response studies and mechanistic data including Smurf  
459 expression analysis; A.J.R. and A.H.K.R. collected and analysed human cartilage  
460 samples; H.W. and S.A. performed the scoring for osteoarthritis

#### 461 **Funding:**

462 This work was supported by grants from the Department of Biotechnology, India  
463 (DBT) BT/PR17362/MED/30/1648/2017 and BT/IN/DENMARK/08/JD/2016 to A.B.;  
464 Versus Arthritis Grants 19667 and 21156 to CDB and AJR, Fellowships to APJ, BK,  
465 and SFI are supported by fellowships from the Ministry of Education, Govt. of India.  
466 Fellowship to AKS was supported by Science and Engineering Research Board,  
467 Govt. of India. APJ travelled to Western University Canada with Shastri Research

468 Student Fellowship (SRSF, 2015-'16). A.H.K.R. was supported by the Wellcome  
469 Trust through the Scottish Translational Medicine and Therapeutics Initiative (Grant  
470 No. WT 085664).

471

#### 472 **Competing Interests:**

473 The authors declare the following competing interests:

474 The use of BMP inhibitors as locally administered agents using sustained drug  
475 delivery vehicle(s) has been submitted for patent via Indian patent application  
476 number – **201911044840**.

477 The inventor(s) are:

- 478 1. Dr. Amitabha Bandyopadhyay–IIT Kanpur, India,
- 479 2. Mr. Akrit Pran Jaswal -IIT Kanpur, India.
- 480 3. Mr. Bhupendra Kumar-IIT Kanpur,India.
- 481 4. Dr. Praveen Vemula – Institute for Stem Cell Biology and Regenerative  
482 Medicine, India.
- 483 5. Dr. Manohar Mahato - Institute for Stem Cell Biology and Regenerative  
484 Medicine, India.

485

#### 486 **References:**

- 487 1. A. Ray, P. N. P. Singh, M. L. Sohaskey, R. M. Harland, A. Bandyopadhyay, Precise  
488 spatial restriction of BMP signaling is essential for articular cartilage differentiation.  
489 *Development*. **142**, 1169–1179 (2015).
- 490 2. P. Occhetta, S. Pigeot, M. Rasponi, B. Dasen, A. Mehrkens, T. Ullrich, I. Kramer, S.  
491 Guth-Gundel, A. Barbero, I. Martin, Developmentally inspired programming of adult human  
492 mesenchymal stromal cells toward stable chondrogenesis. *Proc Natl Acad Sci U S A*. **115**,  
493 4625–4630 (2018).

- 494 3. D. Symmons, C. Mathers, B. Pflieger, Global burden of osteoarthritis in the year 2000.  
495 *WHO global burden of disease* (2003).
- 496 4. D. Chen, J. Shen, W. Zhao, T. Wang, L. Han, J. L. Hamilton, H.-J. Im, Osteoarthritis:  
497 toward a comprehensive understanding of pathological mechanism. *Bone Res.* **5**, 16044  
498 (2017).
- 499 5. V. Rosen, Mechanisms of endochondral ossification in the pathogenesis of OA.  
500 *Osteoarthritis and Cartilage.* **21**, S1 (2013).
- 501 6. L. Pulsatelli, O. Addimanda, V. Brusi, B. Pavloska, R. Meliconi, New findings in  
502 osteoarthritis pathogenesis: therapeutic implications. *Ther Adv Chronic Dis.* **4**, 23–43 (2013).
- 503 7. E. Kozhemyakina, A. B. Lassar, E. Zelzer, A pathway to bone: signaling molecules and  
504 transcription factors involved in chondrocyte development and maturation. *Development.*  
505 **142**, 817–831 (2015).
- 506 8. N. Ortega, D. J. Behonick, Z. Werb, Matrix remodeling during endochondral  
507 ossification. *Trends Cell Biol.* **14**, 86–93 (2004).
- 508 9. F. Long, D. M. Ornitz, Development of the endochondral skeleton. *Cold Spring Harb*  
509 *Perspect Biol.* **5**, a008334 (2013).
- 510 10. L. Dahlberg, R. C. Billingham, P. Manner, F. Nelson, G. Webb, M. Ionescu, A. Reiner,  
511 M. Tanzer, D. Zukor, J. Chen, H. E. van Wart, A. R. Poole, Selective enhancement of  
512 collagenase-mediated cleavage of resident type II collagen in cultured osteoarthritic  
513 cartilage and arrest with a synthetic inhibitor that spares collagenase 1 (matrix  
514 metalloproteinase 1). *Arthritis Rheum.* **43**, 673–682 (2000).
- 515 11. L. A. Neuhold, L. Killar, W. Zhao, M. L. Sung, L. Warner, J. Kulik, J. Turner, W. Wu, C.  
516 Billingham, T. Meijers, A. R. Poole, P. Babij, L. J. DeGennaro, Postnatal expression in hyaline  
517 cartilage of constitutively active human collagenase-3 (MMP-13) induces osteoarthritis in  
518 mice. *J Clin Invest.* **107**, 35–44 (2001).
- 519 12. H. Enomoto, I. Inoki, K. Komiyama, T. Shiomi, E. Ikeda, K. Obata, H. Matsumoto, Y.  
520 Toyama, Y. Okada, Vascular endothelial growth factor isoforms and their receptors are  
521 expressed in human osteoarthritic cartilage. *Am J Pathol.* **162**, 171–181 (2003).

- 522 13. J.-Y. Ko, M. S. Lee, W.-S. Lian, W.-T. Weng, Y.-C. Sun, Y.-S. Chen, F.-S. Wang,  
523 MicroRNA-29a Counteracts Synovitis in Knee Osteoarthritis Pathogenesis by Targeting VEGF.  
524 *Sci Rep.* **7**, 3584 (2017).
- 525 14. M. W. Lark, E. K. Bayne, J. Flanagan, C. F. Harper, L. A. Hoerrner, N. I. Hutchinson, I. I.  
526 Singer, S. A. Donatelli, J. R. Weidner, H. R. Williams, R. A. Mumford, L. S. Lohmander,  
527 Aggrecan degradation in human cartilage. Evidence for both matrix metalloproteinase and  
528 aggrecanase activity in normal, osteoarthritic, and rheumatoid joints. *J Clin Invest.* **100**, 93–  
529 106 (1997).
- 530 15. S. S. Glasson, R. Askew, B. Sheppard, B. Carito, T. Blanchet, H.-L. Ma, C. R. Flannery,  
531 D. Peluso, K. Kanki, Z. Yang, M. K. Majumdar, E. A. Morris, Deletion of active ADAMTS5  
532 prevents cartilage degradation in a murine model of osteoarthritis. *Nature.* **434**, 644–648  
533 (2005).
- 534 16. Aggrecan degradation in human articular cartilage explants is mediated by both  
535 ADAMTS-4 and ADAMTS-5, doi:10.1002/art.22334.
- 536 17. D. Duprez, E. Bell, M. Richardson, C. Archer, L. Wolpert, P. Brickell, P. Francis-West,  
537 Overexpression of BMP-2 and BMP-4 alters the size and shape of developing skeletal  
538 elements in the chick limb. *Mechanisms of Development* (1996), doi:10.1016/0925-  
539 4773(96)00540-0.
- 540 18. H. Zou, R. Wieser, J. Massagué, L. Niswander, Distinct roles of type I bone  
541 morphogenetic protein receptors in the formation and differentiation of cartilage. *Genes*  
542 *Dev.* **11**, 2191–2203 (1997).
- 543 19. T. Nakase, T. Miyaji, T. Tomita, M. Kaneko, K. Kuriyama, A. Myoui, K. Sugamoto, T.  
544 Ochi, H. Yoshikawa, Localization of bone morphogenetic protein-2 in human osteoarthritic  
545 cartilage and osteophyte. *Osteoarthritis and Cartilage.* **11**, 278–284 (2003).
- 546 20. C. A. Hellingman, E. N. B. Davidson, W. Koevoet, E. L. Vitters, W. B. van den Berg, G. J.  
547 V. M. van Osch, P. M. van der Kraan, Smad signaling determines chondrogenic  
548 differentiation of bone-marrow-derived mesenchymal stem cells: inhibition of Smad1/5/8P  
549 prevents terminal differentiation and calcification. *Tissue Eng Part A.* **17**, 1157–1167 (2011).

- 550 21. S.-Y. Chien, C.-H. Tsai, S.-C. Liu, C.-C. Huang, T.-H. Lin, Y.-Z. Yang, C.-H. Tang, Noggin  
551 Inhibits IL-1 $\beta$  and BMP-2 Expression, and Attenuates Cartilage Degeneration and  
552 Subchondral Bone Destruction in Experimental Osteoarthritis. *Cells*. **9**, 927 (2020).
- 553 22. S. Chawla, M. H. M. Berkelaar, B. Dasen, C. Halleux, S. Guth-Gundel, I. Kramer, S.  
554 Ghosh, I. Martin, A. Barbero, P. Occhetta, Blockage of bone morphogenetic protein signaling  
555 counteracts hypertrophy in a human osteoarthritic micro-cartilage model. *J Cell Sci*. **133**,  
556 jcs249094 (2020).
- 557 23. P. N. P. Singh, C. A. Shea, S. K. Sonker, R. A. Rolfe, A. Ray, S. Kumar, P. Gupta, P.  
558 Murphy, A. Bandyopadhyay, Precise spatial restriction of BMP signaling in developing joints  
559 is perturbed upon loss of embryo movement. *Development*. **145**, dev153460 (2018).
- 560 24. E. Blaney Davidson, E. Vitters, P. Lent, F. Loo, W. Berg, P. Kraan, Elevated  
561 extracellular matrix production and degradation upon bone morphogenetic protein-2 (BMP-  
562 2) stimulation point toward a role for BMP-2 in cartilage repair and remodeling. *Arthritis*  
563 *research & therapy*. **9**, R102 (2007).
- 564 25. P. S. Yadav, P. Prashar, A. Bandyopadhyay, BRITER: a BMP responsive osteoblast  
565 reporter cell line. *PLoS One*. **7**, e37134 (2012).
- 566 26. S. S. Glasson, M. G. Chambers, W. B. Van Den Berg, C. B. Little, The OARSI  
567 histopathology initiative – recommendations for histological assessments of osteoarthritis in  
568 the mouse. *Osteoarthritis and Cartilage*. **18**, S17–S23 (2010).
- 569 27. K. P. H. Pritzker, S. Gay, S. A. Jimenez, K. Ostergaard, J.-P. Pelletier, P. A. Revell, D.  
570 Salter, W. B. van den Berg, Osteoarthritis cartilage histopathology: grading and staging.  
571 *Osteoarthritis and Cartilage*. **14**, 13–29 (2006).
- 572 28. M. P. Khan, K. Khan, P. S. Yadav, A. K. Singh, A. Nag, P. Prasahar, M. Mittal, S. P.  
573 China, M. C. Tewari, G. K. Nagar, D. Tewari, A. K. Trivedi, S. Sanyal, A. Bandyopadhyay, N.  
574 Chattopadhyay, BMP signaling is required for adult skeletal homeostasis and mediates bone  
575 anabolic action of parathyroid hormone. *Bone*. **92**, 132–144 (2016).
- 576 29. H. Schmal, I. H. Pilz, A. T. Mehlhorn, D. Dovi-Akue, C. Kirchhoff, N. P. Südkamp, U.  
577 Gerlach, P. Niemeyer, Expression of BMP-receptor type 1A correlates with progress of

- 578 osteoarthritis in human knee joints with focal cartilage lesions. *Cytotherapy*. **14**, 868–876  
579 (2012).
- 580 30. T. Hayami, M. Pickarski, Y. Zhuo, G. A. Wesolowski, G. A. Rodan, L. T. Duong,  
581 Characterization of articular cartilage and subchondral bone changes in the rat anterior  
582 cruciate ligament transection and meniscectomized models of osteoarthritis. *Bone*. **38**, 234–  
583 243 (2006).
- 584 31. S. S. Glasson, T. J. Blanchet, E. A. Morris, The surgical destabilization of the medial  
585 meniscus (DMM) model of osteoarthritis in the 129/SvEv mouse. *Osteoarthritis Cartilage*.  
586 **15**, 1061–1069 (2007).
- 587 32. A. Bandyopadhyay, K. Tsuji, K. Cox, B. D. Harfe, V. Rosen, C. J. Tabin, Genetic Analysis  
588 of the Roles of BMP2, BMP4, and BMP7 in Limb Patterning and Skeletogenesis. *PLOS*  
589 *Genetics*. **2**, e216 (2006).
- 590 33. P. B. Yu, D. Y. Deng, C. S. Lai, C. C. Hong, G. D. Cuny, M. L. Bouxsein, D. W. Hong, P.  
591 M. McManus, T. Katagiri, C. Sachidanandan, N. Kamiya, T. Fukuda, Y. Mishina, R. T. Peterson,  
592 K. D. Bloch, BMP type I receptor inhibition reduces heterotopic [corrected] ossification. *Nat*  
593 *Med*. **14**, 1363–1369 (2008).
- 594 34. J. Hao, J. N. Ho, J. A. Lewis, K. A. Karim, R. N. Daniels, P. R. Gentry, C. R. Hopkins, C.  
595 W. Lindsley, C. C. Hong, In vivo structure-activity relationship study of dorsomorphin  
596 analogues identifies selective VEGF and BMP inhibitors. *ACS Chem Biol*. **5**, 245–253 (2010).
- 597 35. C. E. Sanvitale, G. Kerr, A. Chaikuad, M.-C. Ramel, A. H. Mohedas, S. Reichert, Y.  
598 Wang, J. T. Triffitt, G. D. Cuny, P. B. Yu, C. S. Hill, A. N. Bullock, A new class of small molecule  
599 inhibitor of BMP signaling. *PLoS One*. **8**, e62721 (2013).
- 600 36. S. Kamekura, K. Hoshi, T. Shimoaka, U. Chung, H. Chikuda, T. Yamada, M. Uchida, N.  
601 Ogata, A. Seichi, K. Nakamura, H. Kawaguchi, Osteoarthritis development in novel  
602 experimental mouse models induced by knee joint instability. *Osteoarthritis Cartilage*. **13**,  
603 632–641 (2005).
- 604 37. M. Kobayashi, G. R. Squires, A. Mousa, M. Tanzer, D. J. Zukor, J. Antoniou, U. Feige,  
605 A. R. Poole, Role of interleukin-1 and tumor necrosis factor alpha in matrix degradation of  
606 human osteoarthritic cartilage. *Arthritis Rheum*. **52**, 128–135 (2005).



- 607 38. L. C. Tetlow, D. J. Adlam, D. E. Woolley, Matrix metalloproteinase and  
608 proinflammatory cytokine production by chondrocytes of human osteoarthritic cartilage:  
609 associations with degenerative changes. *Arthritis Rheum.* **44**, 585–594 (2001).
- 610 39. A. C. Lin, B. L. Seeto, J. M. Bartoszko, M. A. Khoury, H. Whetstone, L. Ho, C. Hsu, S. A.  
611 Ali, A. S. Ali, B. A. Alman, Modulating hedgehog signaling can attenuate the severity of  
612 osteoarthritis. *Nat Med.* **15**, 1421–1425 (2009).
- 613 40. J. Zhou, Q. Chen, B. Lanske, B. C. Fleming, R. Terek, X. Wei, G. Zhang, S. Wang, K. Li, L.  
614 Wei, Disrupting the Indian hedgehog signaling pathway in vivo attenuates surgically induced  
615 osteoarthritis progression in Col2a1-CreERT2; Ihhfl/fl mice. *Arthritis Res Ther.* **16**, R11  
616 (2014).
- 617 41. A. Vortkamp, K. Lee, B. Lanske, G. V. Segre, H. M. Kronenberg, C. J. Tabin, Regulation  
618 of rate of cartilage differentiation by Indian hedgehog and PTH-related protein. *Science.* **273**,  
619 613–622 (1996).
- 620 42. Indian hedgehog signals independently of PTHrP to promote chondrocyte  
621 hypertrophy - PMC, (available at  
622 <https://www.ncbi.nlm.nih.gov/pmc/articles/PMC7188307/>).
- 623 43. K. Gelse, A. B. Ekici, F. Cipa, B. Swoboda, H. D. Carl, A. Olk, F. F. Hennig, P. Klinger,  
624 Molecular differentiation between osteophytic and articular cartilage--clues for a transient  
625 and permanent chondrocyte phenotype. *Osteoarthritis Cartilage.* **20**, 162–171 (2012).
- 626 44. A. A. Pitsillides, F. Beier, Cartilage biology in osteoarthritis--lessons from  
627 developmental biology. *Nat Rev Rheumatol.* **7**, 654–663 (2011).
- 628 45. L. J. Sandell, T. Aigner, Articular cartilage and changes in arthritis. An introduction:  
629 cell biology of osteoarthritis. *Arthritis Res.* **3**, 107–113 (2001).
- 630 46. J. Sokolove, C. M. Lopus, Role of inflammation in the pathogenesis of osteoarthritis:  
631 latest findings and interpretations. *Ther Adv Musculoskelet Dis.* **5**, 77–94 (2013).
- 632 47. M. B. Goldring, M. Otero, Inflammation in osteoarthritis. *Curr Opin Rheumatol.* **23**,  
633 471–478 (2011).

634 48. D. H. Wu, A. K. Hatzopoulos, Bone morphogenetic protein signaling in inflammation.  
635 *Exp Biol Med (Maywood)*. **244**, 147–156 (2019).

636

637

638 **Figure legend:**

639

640 **Fig. 1. Overexpression of BMP signaling in adult joint cartilage is sufficient to**  
641 **induce OA development.**

642 **(A)** Schematic for generation of *pMes-caBmpr1a; TgCol2a1-Cre-ERT2* mice and mis-  
643 expression of constitutively active *Bmpr1a* in the adult cartilage by injecting tamoxifen  
644 (TAM) intraperitoneally at P70. **(B)** 3-D rendering of  $\mu$ CT scan at 40 $\mu$ m resolution in  
645 wildtype (WT) control, vehicle control and TAM injected knee joint at 180 days post  
646 induction, black arrows show osteophytes **(C-F''')** Longitudinal sections through the  
647 adult knee joints of vehicle control (C-H) and mice 7 days (C'-G'), 14 days (C''-G''), 28  
648 days (C''', F'''), 56 days (C''''-F''') post induction by TAM injection. Immunoreactivity for  
649 pSMAD1/5/9 (C-C'''), IHH (D-D'''), ColIII (E-E''') and ColX (F-F'''). **(G-G'')** BrdU  
650 incorporation 7 days (G') and 14 days (G'') after TAM injection. **(G)** Vehicle control. **(H-**  
651 **H')** Safranin O staining in vehicle control (H) and TAM injected knee joints at 180 days  
652 (H') post induction. **(I)** Statistical analysis by Unpaired t-test of OARSI scores at post  
653 TAM injection day 56 with control,  $p < 0.0001$  (\*\*\*\*). **(J)** Quantification data for ColIII,  
654 Unpaired t- test was performed to compare the means of stage matched control vs  
655 post injected (PI) TAM test animals at different time points, Control vs Test-PI day 7,  
656  $p = 0.4573$  (ns), Control vs Test, PI day 14,  $p = 0.0301$  (\*), Control vs Test, PI day 28,  
657  $p = 0.0003$  (\*\*\*), Control vs Test, PI day 56,  $p < 0.0001$  (\*\*\*\*). **(K)** Quantification data for  
658 ColX, Unpaired t- test was performed to compare the means of stage matched control  
659 vs post injected (PI) TAM test animals at different time points, Control vs Test-PI day  
660 7,  $p = 0.3731$  (ns), Control vs Test, PI day 14,  $p = 0.0101$  (\*), Control vs Test, PI day 28,  
661  $p = 0.0004$  (\*\*\*), Control vs Test, PI day 56,  $p < 0.0001$  (\*\*\*\*).  $n = 5$  per group. Scale bar  
662 = 100 $\mu$ m

663

664 **Fig. 2. BMP signaling induced transient cartilage differentiation is necessary for the**  
665 **pathogenesis of OA.**

666 **(A)** Schematic representation depicting the generation of *Bmp2<sup>c/c</sup>; Bmp4<sup>c/c</sup>; TgCol2a1-*  
667 *Cre-ERT2* and the regimen for depletion of BMP signaling by administration of  
668 tamoxifen followed by ACLT. **(B-F'')** Longitudinal sections through the knee joints of  
669 sham (B-F), "ACLT + vehicle" control (B'-F') and "BMP depletion + ACLT" (B''-F'') mice  
670 at 56 days post-surgery (PS56). Immunoreactivity for pSMAD1/5/9 (B-B''), Col11 (C-  
671 C''), ColX (D-D''), MMP-13 (E-E''). (F-F'') Safranin O staining. **(G-G'')** 3-D rendering of  
672  $\mu$ CT at PS56. Red arrowheads indicate osteophytes, surface roughness, and damage.  
673 n=5 per time point per group. Scale bar = 100 $\mu$ m. **(H-I''')** Histological sections of knee  
674 articular cartilage from OA patients (n=6) (J-J'''), and a patient without known history  
675 of knee OA (n=1) (I-I'''). (H, I) Safranin O/Fast Green staining of OA (H) and normal (I)  
676 cartilage. Immunoreactivity for pSMAD1/5/9 with (H', I') or without phosphatase pre-  
677 treatment to verify antibody specificity (H'', H''', I'', I'''), of OA (H'-H''') and normal (I'-I''')  
678 cartilage. (H''', I''') Higher magnification view of the marked regions in H'' and I''. **(J)**  
679 Quantification data for Col11, one way ANOVA was performed along the three sets and  
680  $p < 0.0001$  (\*\*\*\*). We compared the means of sham control vs ACLT+vehicle;  $p < 0.0001$   
681 (\*\*\*\*), sham control vs BMP depleted+ACLT;  $p = 0.2319$  (ns) and ACLT+vehicle vs.  
682 BMP depleted+ ACLT  $p = 0.0005$  (\*\*\*) **(K)** Quantification data of ColX., one way ANOVA  
683 was performed along the three sets and  $p < 0.0001$  (\*\*\*\*) the means of sham control vs  
684 ACLT+vehicle;  $p < 0.0001$  (\*\*\*\*), sham control vs BMP depleted+ACLT;  $p = 0.1595$  (ns)  
685 and ACLT+vehicle vs. BMP depleted+ ACLT  $p = 0.0004$  (\*\*\*) **(L)** OARSI score, one-way  
686 ANOVA was performed,  $p = 0.0001$  (\*\*\*), the means of sham control vs ACLT+vehicle;  
687  $p = 0.0001$  (\*\*\*), sham control vs BMP depleted+ACLT;  $p = 0.2195$  (ns) and  
688 ACLT+vehicle vs. BMP depleted+ ACLT  $p = 0.0018$  (\*\*). Scale bar = 100 $\mu$ m.  
689 The panels where *Bmp2/4* depleted animals were subjected to ACLT are marked as  
690 "BMP depletion + ACLT". Vehicle injected animals were used as genotype controls  
691 ("ACLT + Vehicle". "Sham" refers to *Bmp2<sup>c/c</sup>; Bmp4<sup>c/c</sup>; TgCol2a1-Cre-ERT2* animals  
692 which underwent sham surgery without ACLT.

693

694 **Fig. 3. Local pharmacological inhibition of BMP signaling halts the progression**  
695 **of osteoarthritic changes.**

696 **(A)** Schematic for local inhibition of BMP signaling using LDN-193189 in surgically  
697 induced OA in wildtype mice. **(B-F'')** Longitudinal sections through the knee joints of  
698 sham (B-F), "ACLT + vehicle" control (B'-F') and "ACLT + LDN-193189" (B''-F'') mice  
699 at 28 days post-surgery (PS28). Immunoreactivity for pSMAD1/5/9 (B-B''), ColIII (C-  
700 C''), ColX (D-D''), MMP-13 (E-E''). (F-F'') Safranin O staining. **(G)** Quantification data  
701 for ColIII, one way ANOVA was performed along the three sets and  $p < 0.0001$ (\*\*\*\*).  
702 The comparison of Sham control vs ACLT+vehicle;  $p < 0.0001$  (\*\*\*\*), Sham control vs  
703 ACLT+ LDN-193189;  $p = 0.0263$  (\*) and ACLT+vehicle vs. ACLT+ LDN-193189  
704  $p < 0.0001$ (\*\*\*\*). **(H)** Quantification data for ColX, one way ANOVA was performed  
705 along the three sets and  $p < 0.0001$ (\*\*\*\*). The comparison of Sham control vs  
706 ACLT+vehicle;  $p < 0.0001$  (\*\*\*\*), Sham control vs ACLT+ LDN-193189;  $p = 0.3897$  (ns)  
707 and ACLT+vehicle vs. ACLT+ LDN-193189  $p < 0.0001$ (\*\*\*\*). **(I)** OARSI score, one-way  
708 ANOVA was performed,  $p < 0.0001$ (\*\*\*\*), the comparison of means of Sham control vs  
709 ACLT+vehicle;  $p = 0.0001$  (\*\*\*\*), Sham control vs ACLT+LDN-193189;  $p = 0.2460$  (ns)  
710 and ACLT+vehicle vs. ACLT+LDN-193189  $p < 0.0001$ (\*\*\*\*); Scale bar = 100 $\mu$ m, n=5  
711 per group.

712

713 **Fig. 4. Inhibition of BMP signaling post onset of OA attenuates disease severity.**

714 **(A)** Schematic for local inhibition of BMP signaling, using of LDN-193189, in the knee  
715 joint of wildtype mouse post-surgical onset of OA. **(B-E'')** Longitudinal sections through  
716 the knee joints of sham (B-E), "ACLT + vehicle" control (B'-E') and "ACLT + LDN-  
717 193189" (B''-E'') mice at 56 days post-surgery (PS56). Immunoreactivity for ColIII (B-  
718 B''), ColX(C-C''), MMP13 (D-D''). (E-E'') Safranin O staining. **(F-F'')** 3-D rendering of  
719  $\mu$ CT scan at resolution of 5.86  $\mu$ m per pixel in sham, "ACLT + vehicle" control and  
720 "ACLT+ LDN-193189" injected knee joint at PS56 (Red arrows mark osteophytes). **(G)**  
721 Quantification data for ColIII, one way ANOVA was performed along the three sets and  
722  $p < 0.0001$ (\*\*\*\*). The comparison of  
723 Sham control vs ACLT+vehicle;  $p < 0.0001$  (\*\*\*\*), Sham control vs ACLT+ LDN-  
724 193189;  $p = 0.0088$  (\*\*) and ACLT+vehicle vs. ACLT+ LDN-193189  $p < 0.0001$ (\*\*\*\*). **(H)**  
725 Quantification data for ColX, one way ANOVA was performed along the three sets and  
726  $p < 0.0001$ (\*\*\*\*). The comparison of Sham control vs ACLT+vehicle;  $p < 0.0001$  (\*\*\*\*),  
727 Sham control vs ACLT+ LDN-193189;  $p = 0.0111$  (\*) and ACLT+vehicle vs. ACLT+

728 LDN-193189  $p < 0.0001$  (\*\*\*\*). **(I)** OARSI score, one-way ANOVA was performed,  
729  $p < 0.0001$  (\*\*\*\*), the comparison of means of Sham control vs ACLT+vehicle;  $p < 0.0001$   
730 (\*\*\*\*), Sham control vs ACLT+LDN-193189;  $p = 0.0042$  (\*\*) and ACLT+vehicle vs.  
731 ACLT+LDN-193189  $p = 0.0002$  (\*\*\*). Scale bar = 100 $\mu$ m, n=6 per group.

732

733 **Fig. 5. Local inhibition of BMP signaling post-onset of surgically induced OA attenuates**  
734 **the severity of OA associated changes for longer duration.**

735 **(A)** Schematic for local inhibition of BMP signaling, using of LDN-193189, in the knee  
736 joint of wildtype mouse post-surgical onset of OA. Longitudinal sections through the  
737 knee joints of ACLT induced OA mice **(B-D''')**. "ACLT + vehicle" control (B, C and D),  
738 "ACLT + LDN-193189 one dose" (B', C' and D'), "ACLT + LDN-193189 two doses" (B'',  
739 C'' and D''), "ACLT + LDN-193189 three doses" (B''', C''' and D''') mice at 84 days post  
740 ACLT. Immunoreactivity for ColIII (B- B'''), ColX (C- C''') and Safranin O staining (D-  
741 D'''). **(E-E'')** Immunoreactivity for SMURF1 in Sham control (E), post ACLT 28 days  
742 (E') and 56 days (E''). **(F)** Quantification of SMURF1 negative cells in articular  
743 cartilage, one way ANOVA was performed along the three sets with  $p < 0.0001$ . The  
744 comparison of Sham control vs. post ACLT Day28  $p = 0.0007$  (\*\*\*), Sham control vs.  
745 Post ACLT Day 56  $p = 0.0001$  (\*\*\*\*) and Post ACLT Day28 vs. post ACLT Day 56  
746  $p = 0.6523$  (ns). Scale bar = 100 $\mu$ m, n=6 per group.

747

748 **Fig. 6. Effect of local inhibition of BMP signaling on inflammatory responses in a**  
749 **surgically induced osteoarthritic mouse model.**

750 **(A)** Schematic for local inhibition of BMP signaling, using of LDN-193189, in the knee  
751 joint of wildtype mouse post-surgical onset of OA. **(B-C'')** Longitudinal sections  
752 through the knee joints of sham (B-C), "ACLT + vehicle" control (B'-C') and "ACLT +  
753 LDN-193189" (B''-C'') mice at 56 days post-surgery (PS56). Immunoreactivity for NF-  
754  $\kappa$ B (B-B'') and TNF- $\alpha$  (C-C'') levels. White arrows indicate TNF- $\alpha$  positive cells. **(D)**  
755 Quantification data for NF- $\kappa$ B, one way ANOVA was performed along the three sets  
756 and  $p < 0.0001$  (\*\*\*\*). The comparison of Sham control vs ACLT+vehicle;  $p < 0.0001$   
757 (\*\*\*\*), Sham control vs ACLT+ LDN-193189;  $p = 0.1601$  (ns) and ACLT+vehicle vs.  
758 ACLT+ LDN-193189  $p = 0.0002$  (\*\*\*). **(H)** Quantification data for TNF-  $\alpha$ , one way  
759 ANOVA was performed along the three sets and  $p < 0.0001$  (\*\*\*\*). The comparison of

760 Sham control vs ACLT+vehicle;  $p < 0.0001$  (\*\*\*\*), Sham control vs ACLT+ LDN-  
761 193189;  $p = 0.4479$  (ns) and ACLT+vehicle vs. ACLT+ LDN-193189  $p < 0.0001$  (\*\*\*\*).  
762 Scale bar =  $100\mu\text{m}$ ,  $n = 6$  per group.

763

764



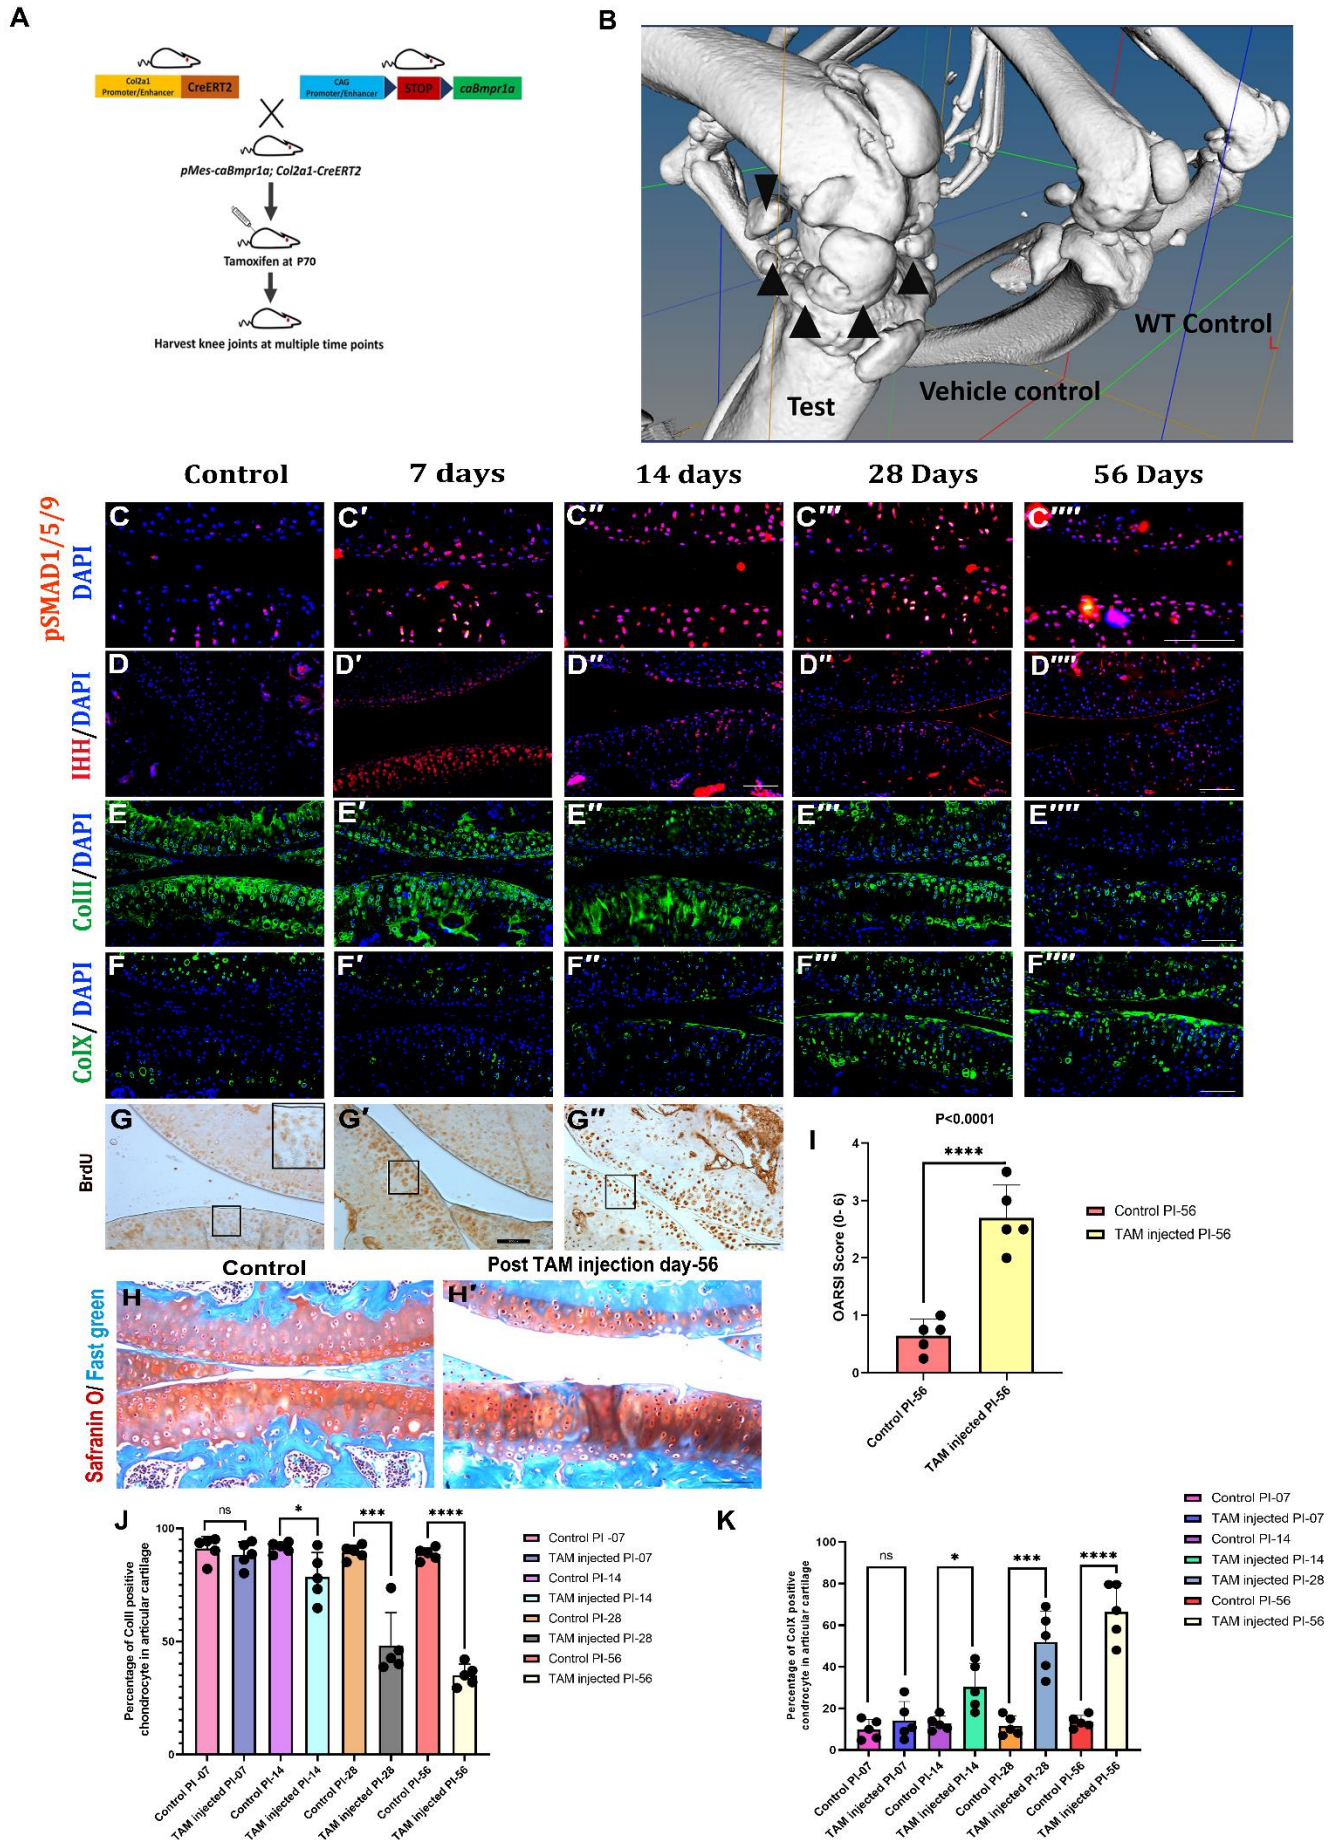

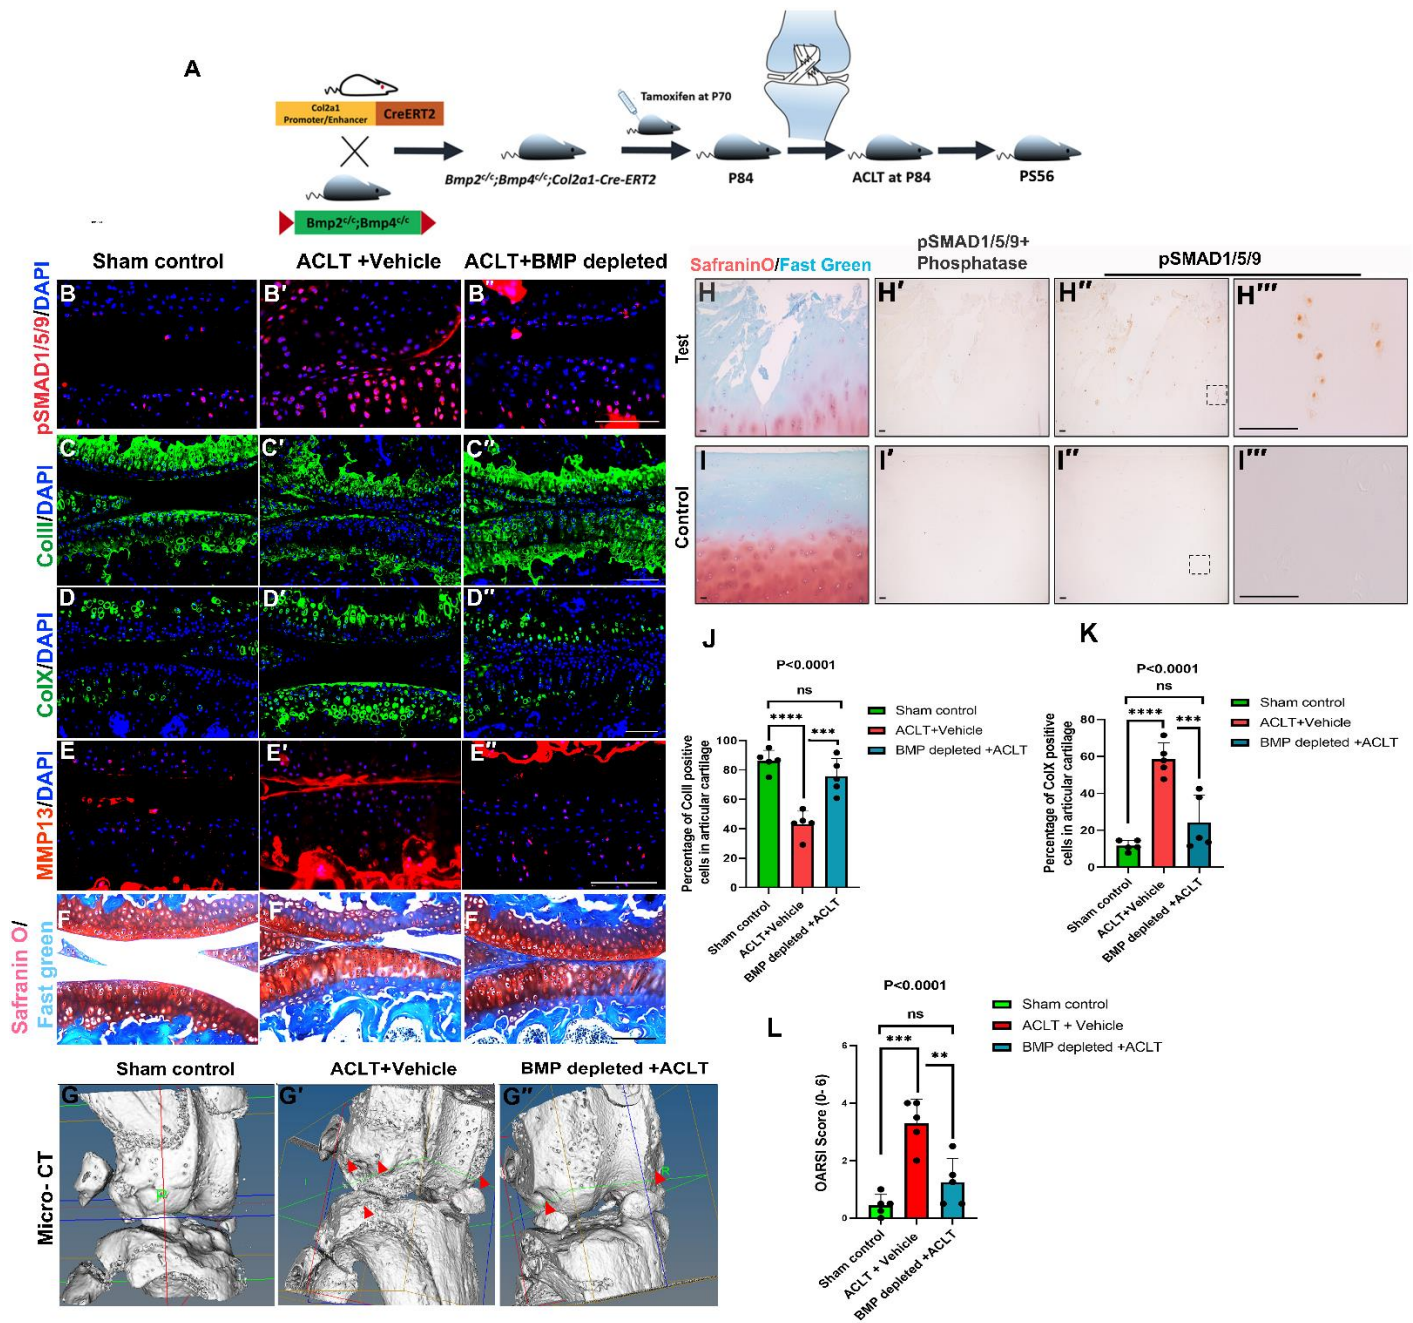

Fig.2

766

767



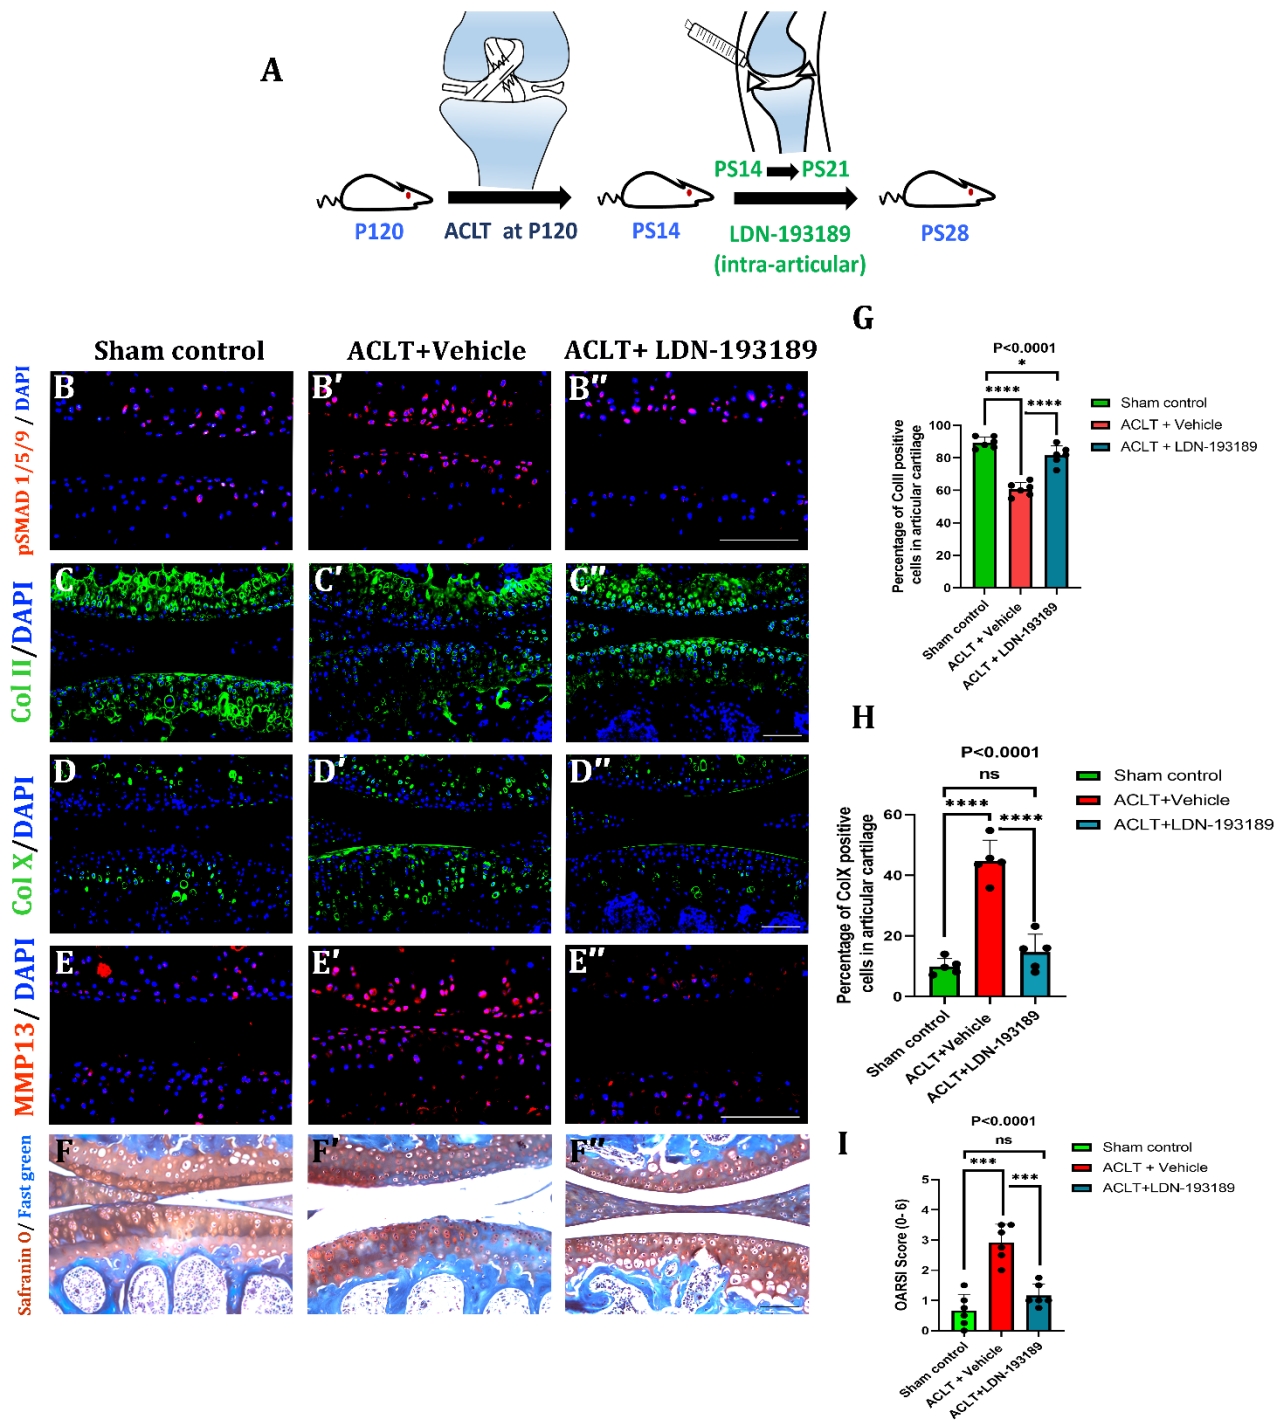

Fig 3

768

769

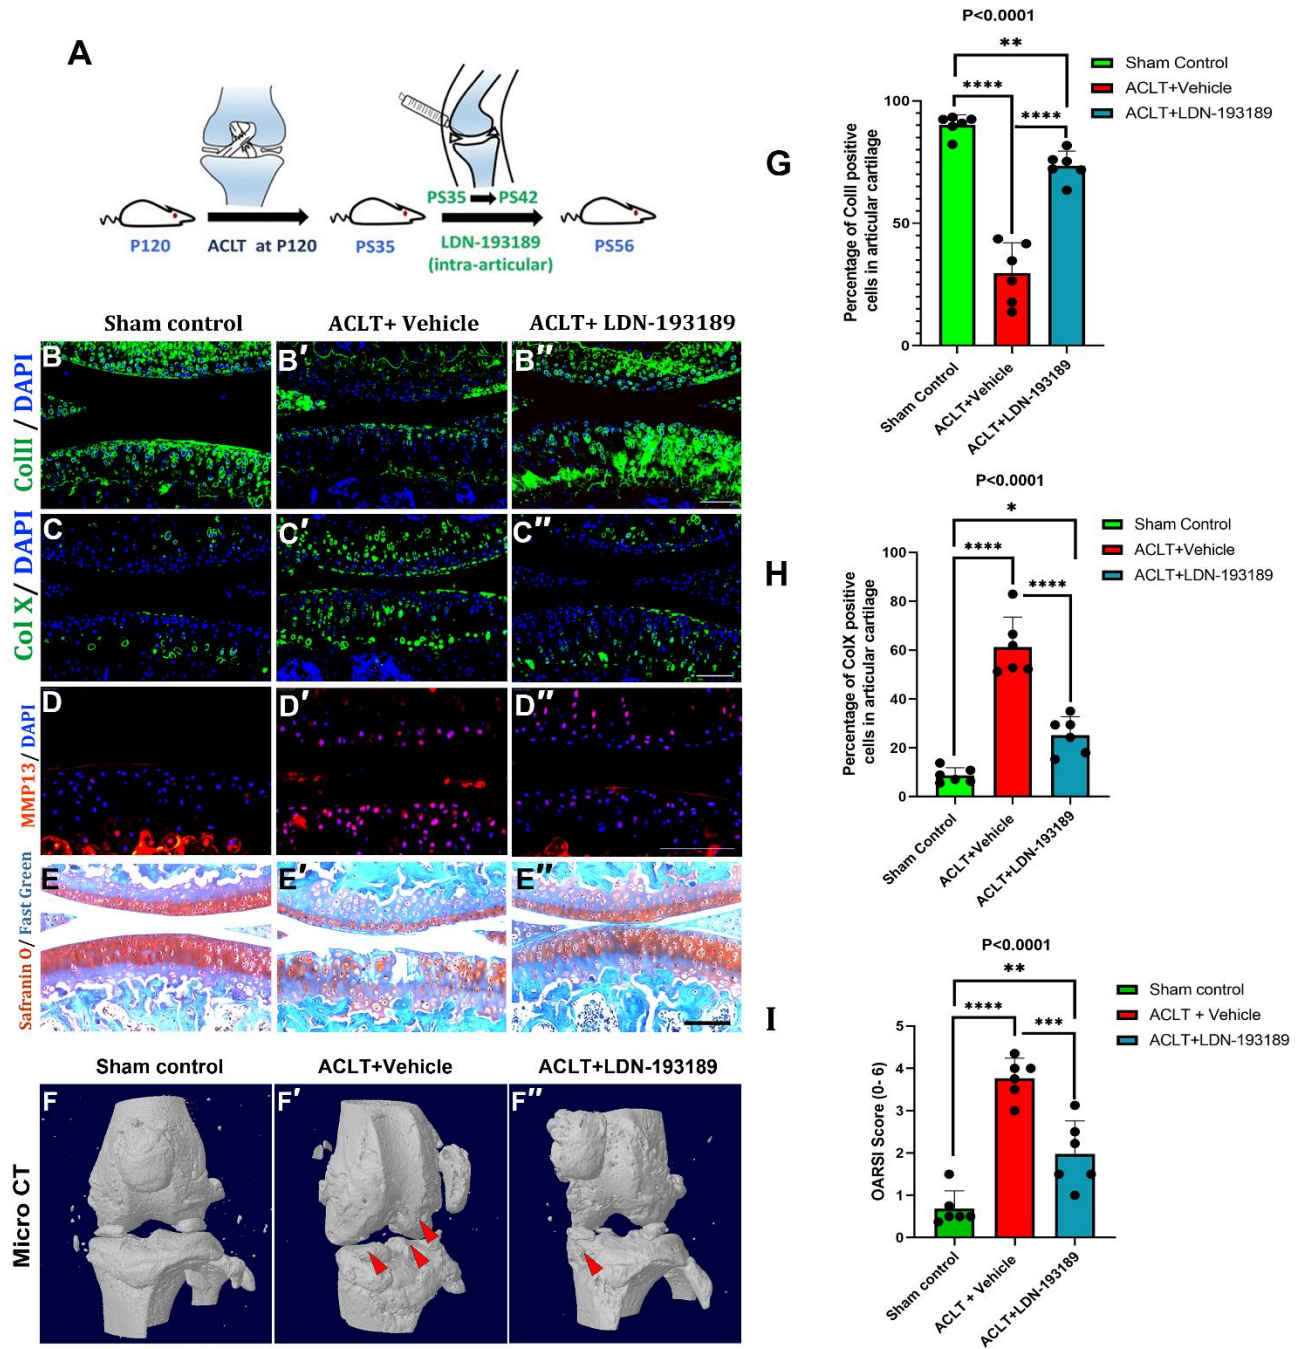

Fig.4

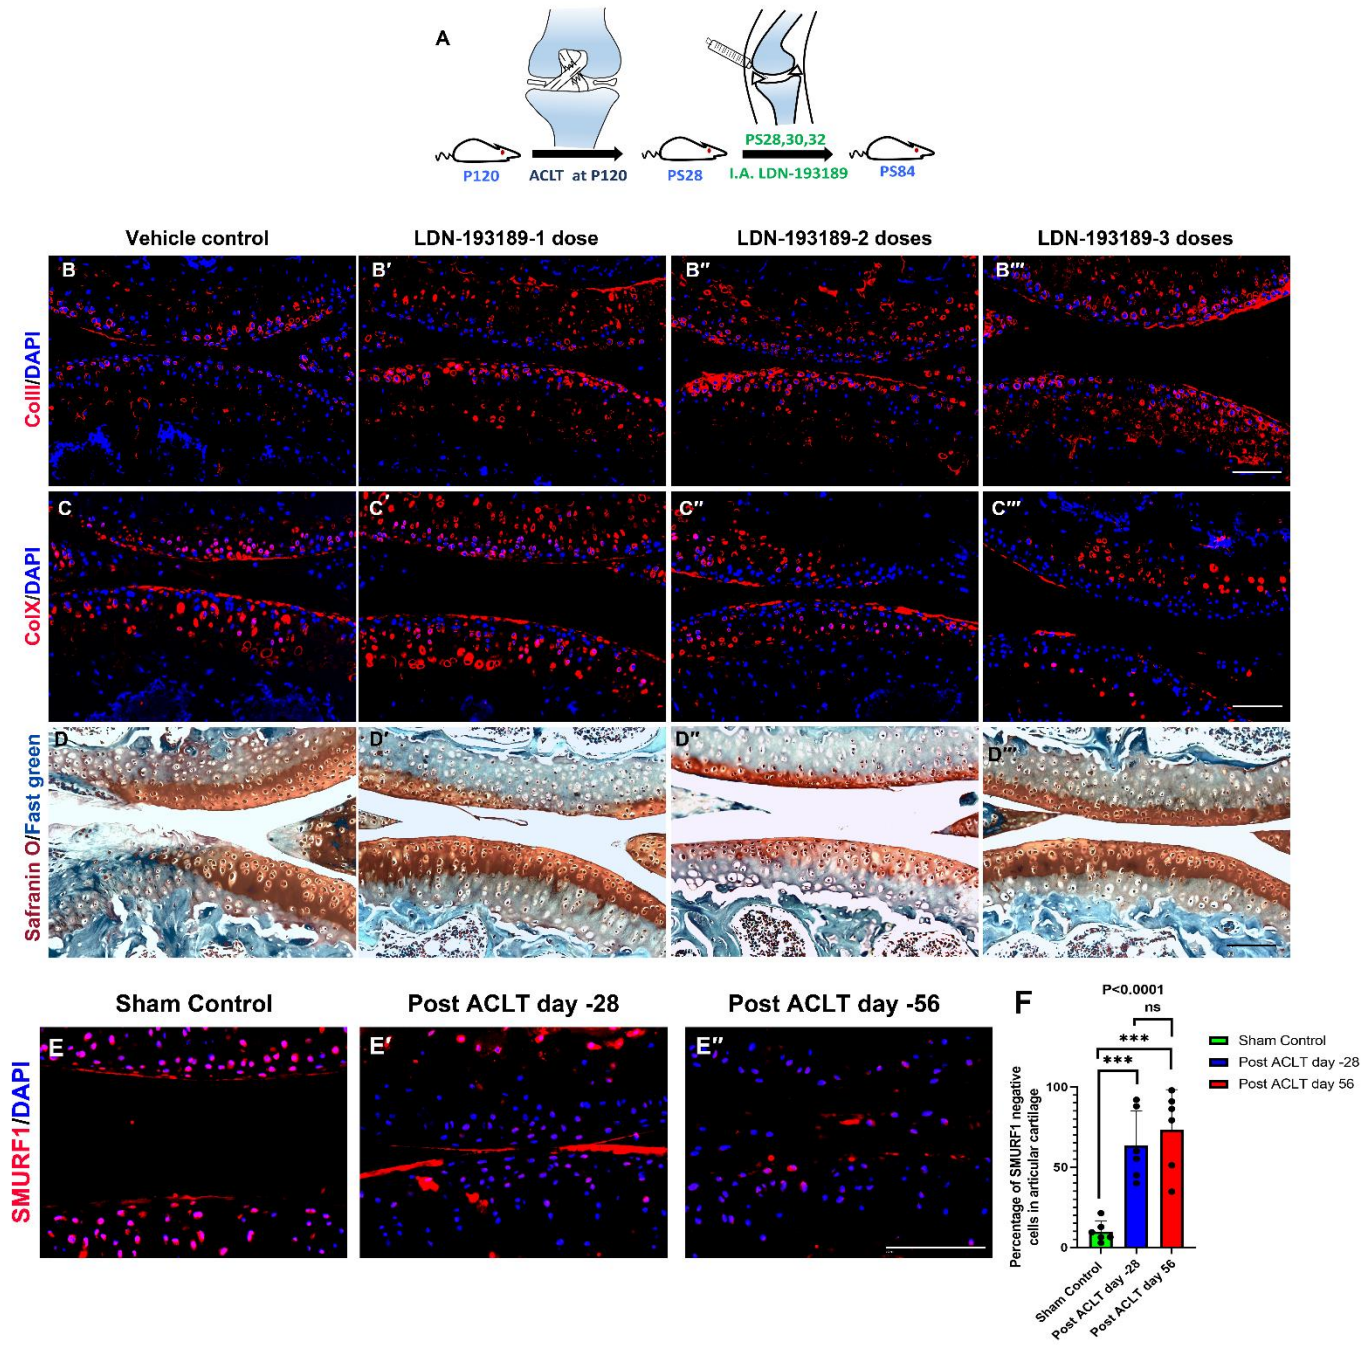

Fig.5



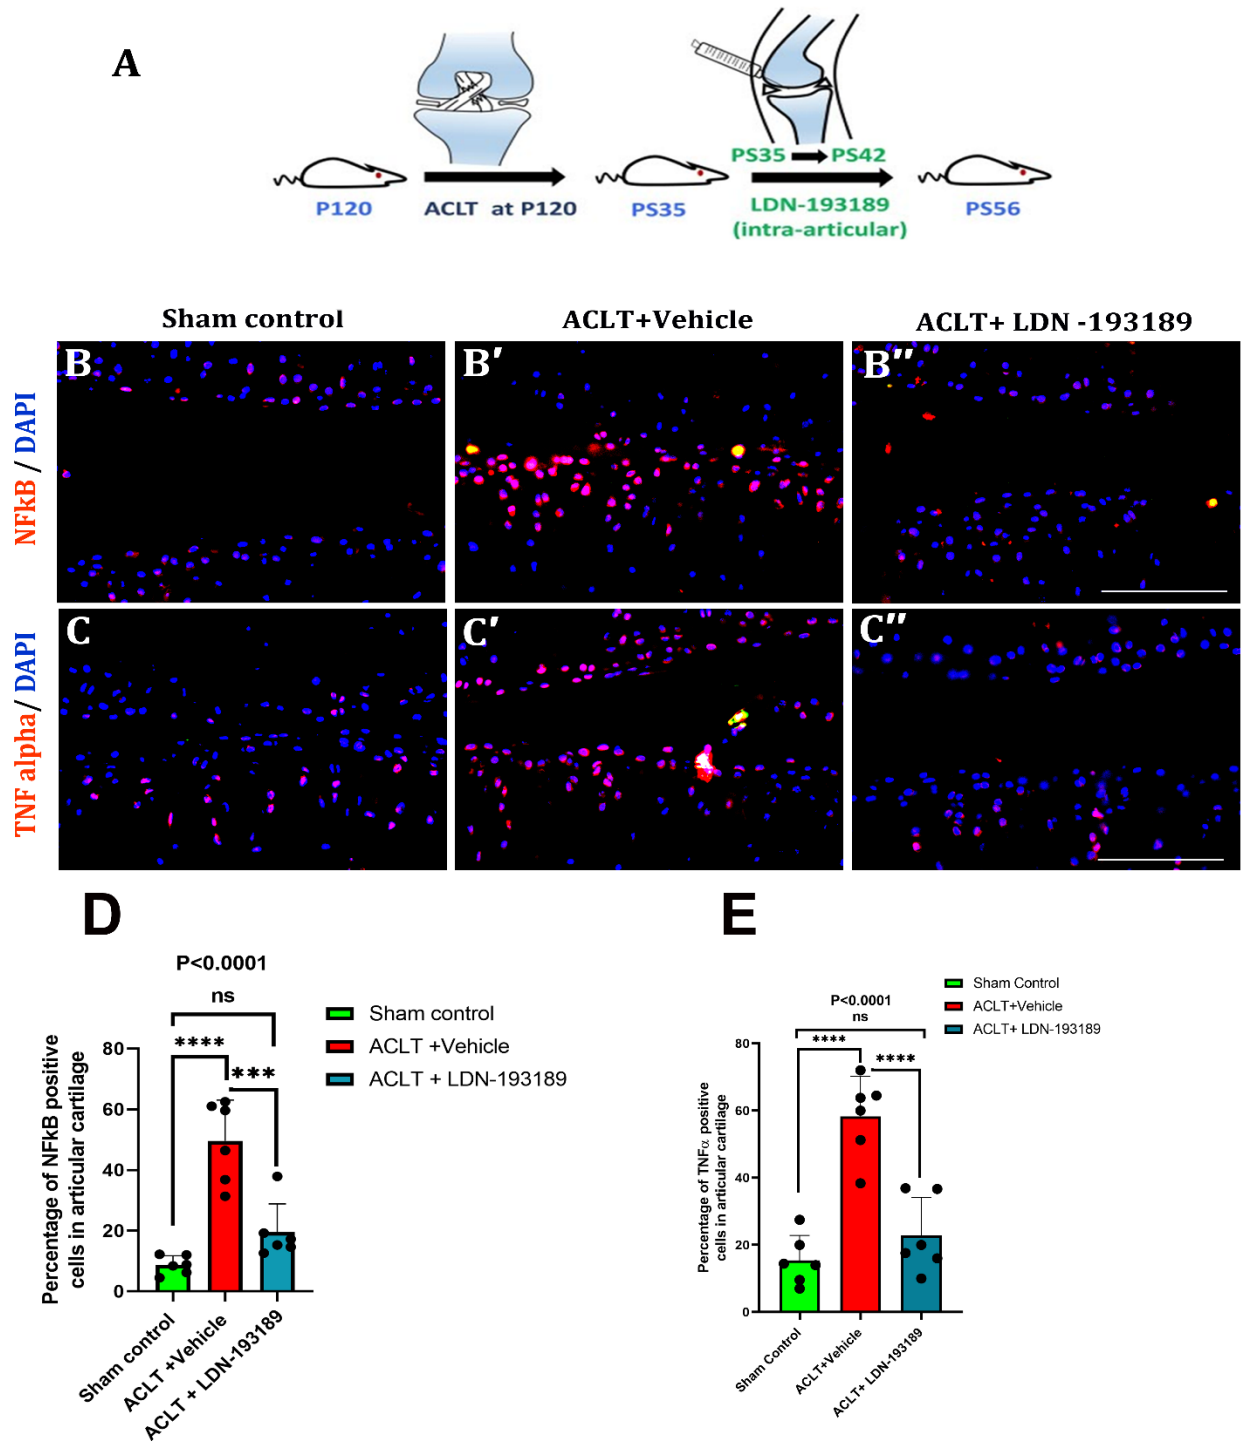

Fig.6
